# Supplementary material for: Effects of optical-inert ions on upconversion luminescence and temperature sensing properties of ScVO4:10%Yb3+/2%Er3+ nano/micro-particles
Source: Royal Society of Chemistry journal article supplement (doi:10.1039/c7ra10035c), 2017-01-01
Supplement: c7ra10035c1.pdf [file c7ra10035c1.pdf]

**Effects of non-luminescent center metal ions on upconversion  
luminescence and temperature sensing properties of  
ScVO<sub>4</sub>:10%Yb<sup>3+</sup>/2%Er<sup>3+</sup> nano/micro-particles**

Peng Li,<sup>a</sup> Linna Guo,<sup>a\*</sup> Chenxi Liang,<sup>a</sup> Tiesheng Li,<sup>a\*</sup> Penglei chen,<sup>b</sup> Minghua Liu,<sup>b\*</sup> Yangjie Wu<sup>a\*</sup>

<sup>a</sup>*College of Chemistry and Molecular Engineering, Zhengzhou University, The Key Lab of Chemical Biology and Organic Chemistry of Henan Province, The Key Lab of Nano-information Materials of Zhengzhou, Zhengzhou, 450001, P. R. China.*

<sup>b</sup>*Beijing National Laboratory for Molecular Science, Institute of Chemistry, Chinese Academy of Sciences, Beijing 100190, P. R. China.*

\*Corresponding author.

E-mail address: Linna Guo, guolinna@zzu.edu.cn; Tiesheng Li, lts34@zzu.edu.cn

Tel.: +86-371-67766660 (Office)

Fax.: +86-371-67766660 (Office)

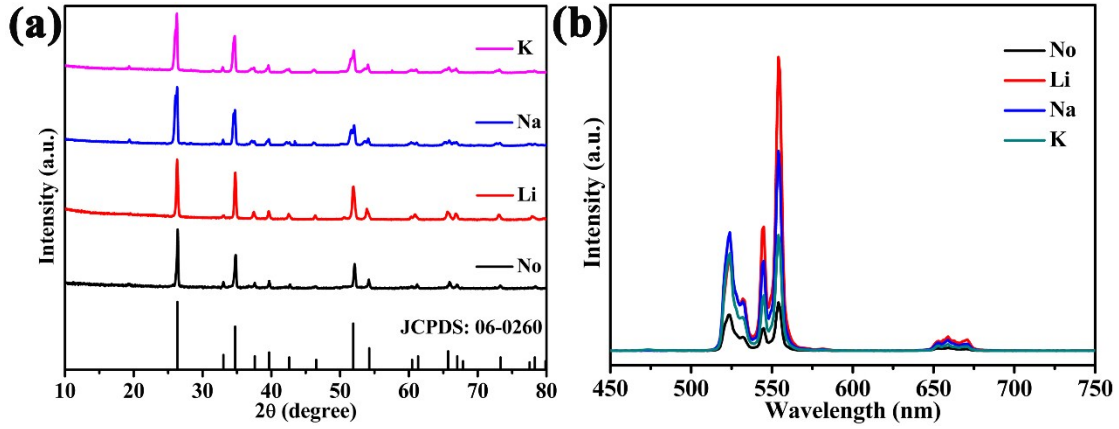

Fig. S1 XRD patterns (a), UC emission spectra (b) of alkali metal ions ( $\text{Li}^+$ ,  $\text{Na}^+$  or  $\text{K}^+$ ) doped  $\text{ScVO}_4:10\%\text{Yb}^{3+}/2\%\text{Er}^{3+}$  samples

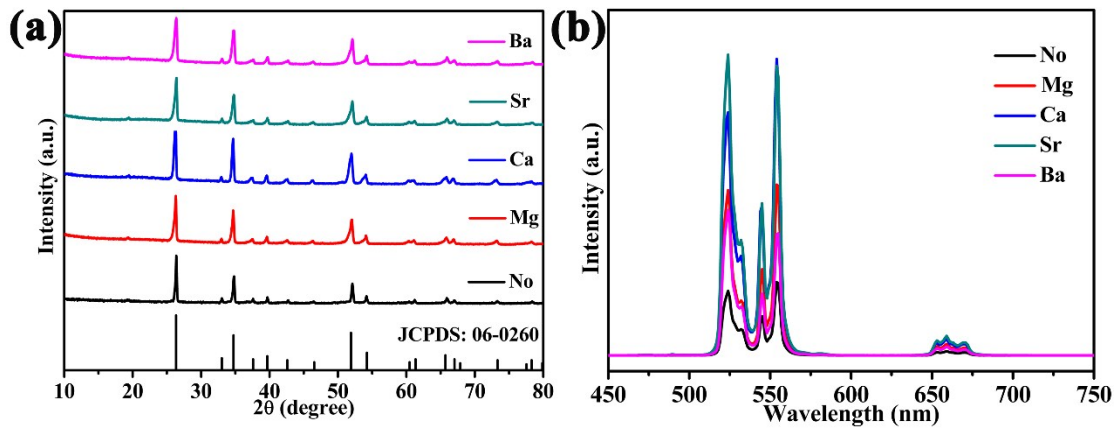

Fig. S2 XRD patterns (a), UC emission spectra (b) of alkaline earth metal ions ( $\text{Mg}^{2+}$ ,  $\text{Ca}^{2+}$ ,  $\text{Sr}^{2+}$  or  $\text{Ba}^{2+}$ ) doped  $\text{ScVO}_4:10\%\text{Yb}^{3+}/2\%\text{Er}^{3+}$  samples

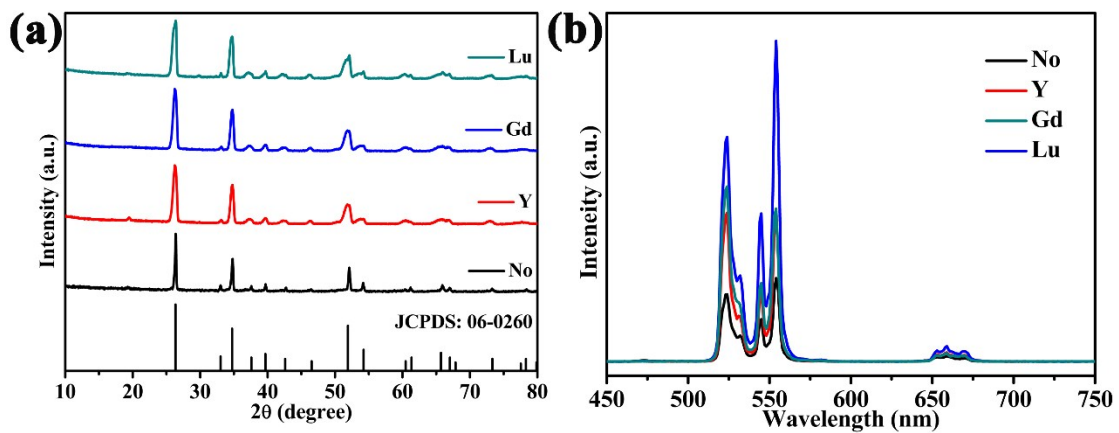

Fig. S3 XRD patterns (a), UC emission spectra (b) of ( $\text{Y}^{3+}$ ,  $\text{Gd}^{3+}$  or  $\text{Lu}^{3+}$ ) doped  $\text{ScVO}_4:10\%\text{Yb}^{3+}/2\%\text{Er}^{3+}$  samples
